# Supplementary material for: Sex-specific developmental models for Creophilus maxillosus (L.) (Coleoptera: Staphylinidae): searching for larger accuracy of insect age estimates
Source: Springer Nature journal article supplement (doi:10.1007/s00414-017-1713-4), 2017-10-24
Supplement: MOESM1 [file 15159056]

## SUPPLEMENTARY FIGURES FOR

“Sex-specific developmental models for *Creophilus maxillosus* (L.) (Coleoptera: Staphylinidae): searching for larger accuracy of insect age estimates”

International Journal of Legal Medicine

Katarzyna Frątczak-Łagiewska M.Sc.<sup>1,2\*</sup>, Szymon Matuszewski Ph.D.<sup>1</sup>

<sup>1</sup>Laboratory of Criminalistics, Adam Mickiewicz University, Św. Marcin 90, 61-809 Poznań, Poland.

<sup>2</sup>Department of Animal Taxonomy and Ecology, Adam Mickiewicz University, Umultowska 89, 61-614 Poznań, Poland

\*corresponding author, [katarzyna.fratzczak@amu.edu.pl](mailto:katarzyna.fratzczak@amu.edu.pl)

### Content

Fig. 1. Differences between males and females of *C. maxillosus* in duration of life stages at 15°C, 17.5°C, 20°C, 22.5°C, 25°C, 27.5°C, 30°C; ■ – mean, whiskers – standard error of the mean; E – the egg stage, L1 – first larval stage, L2 – second larval stage, L3 – third larval stage, P – pupal stage.

15°C

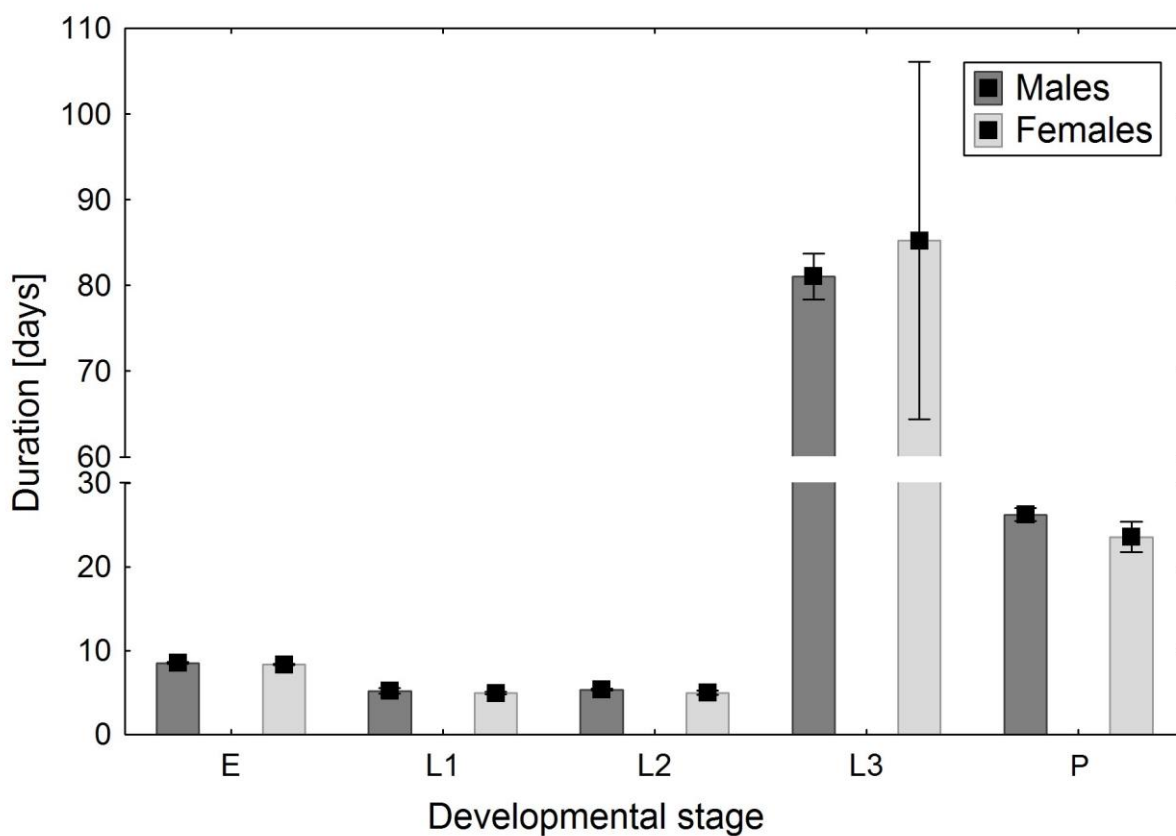

17.5°C

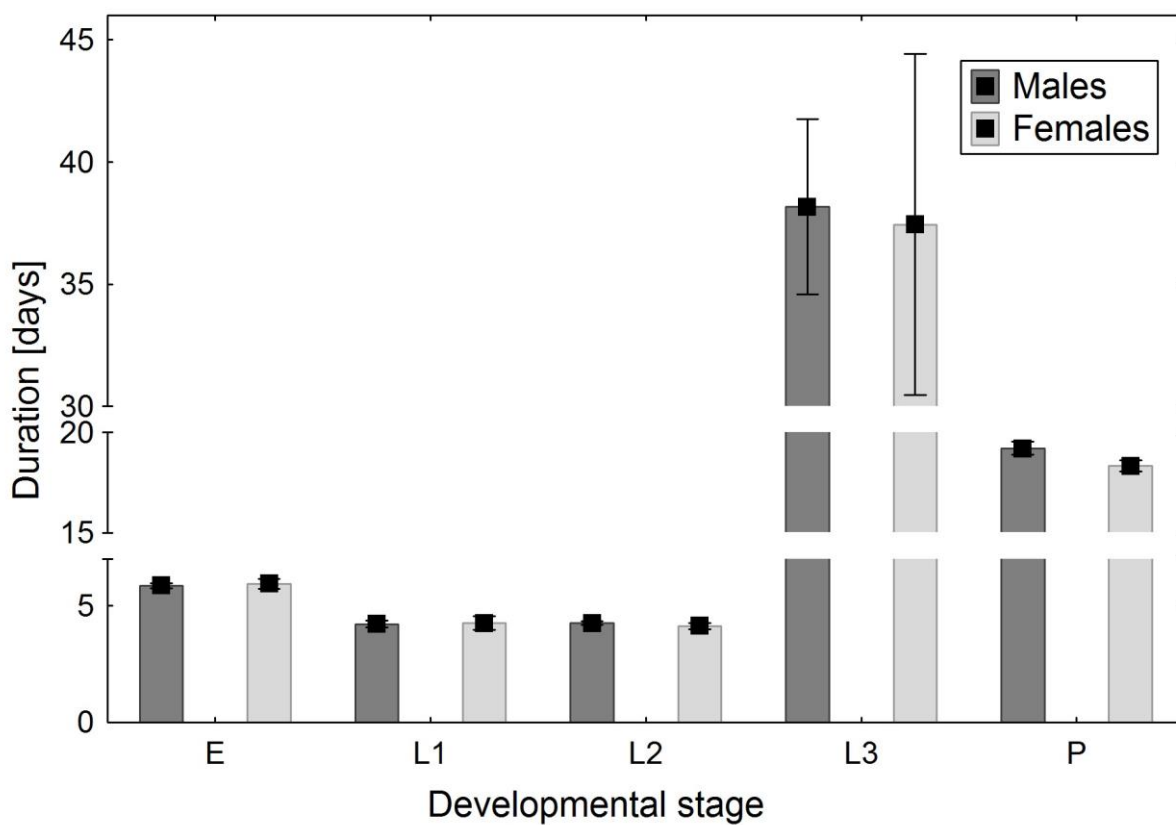

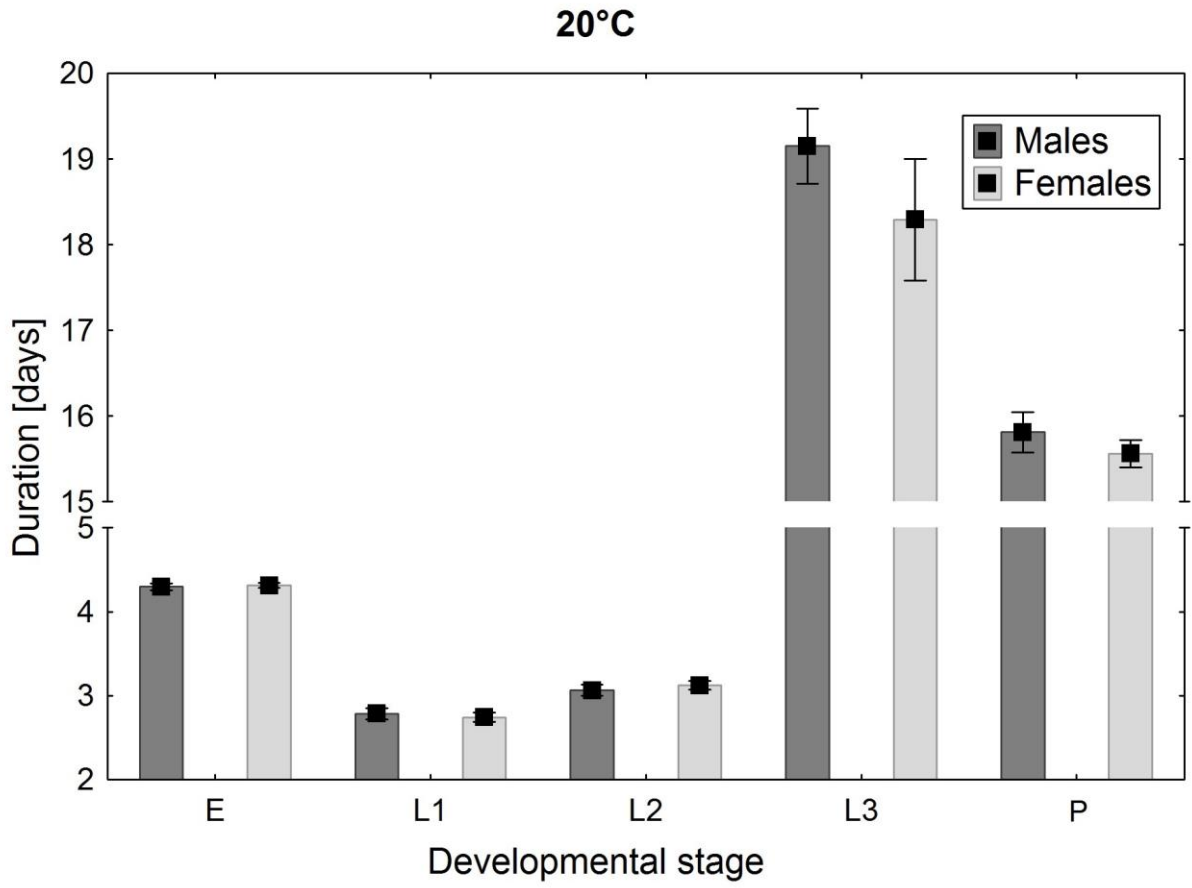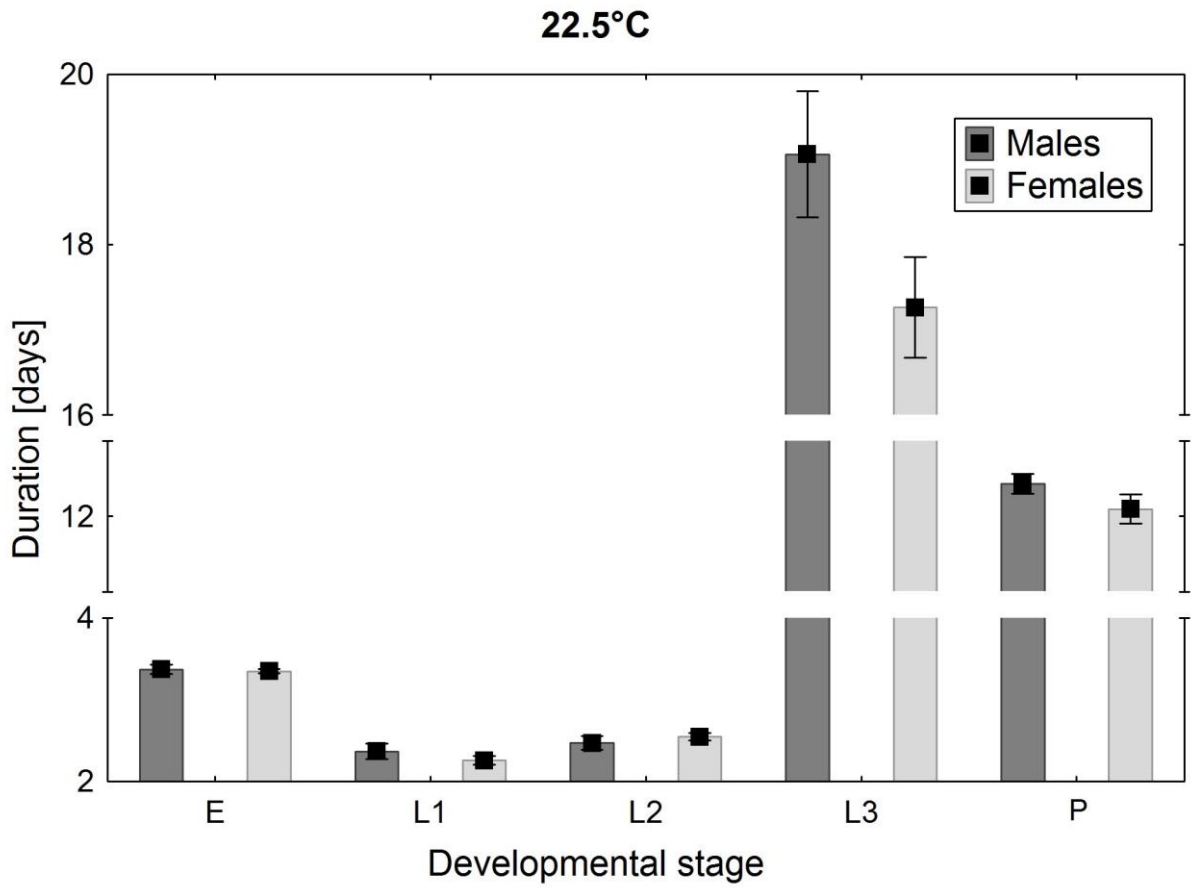

25°C

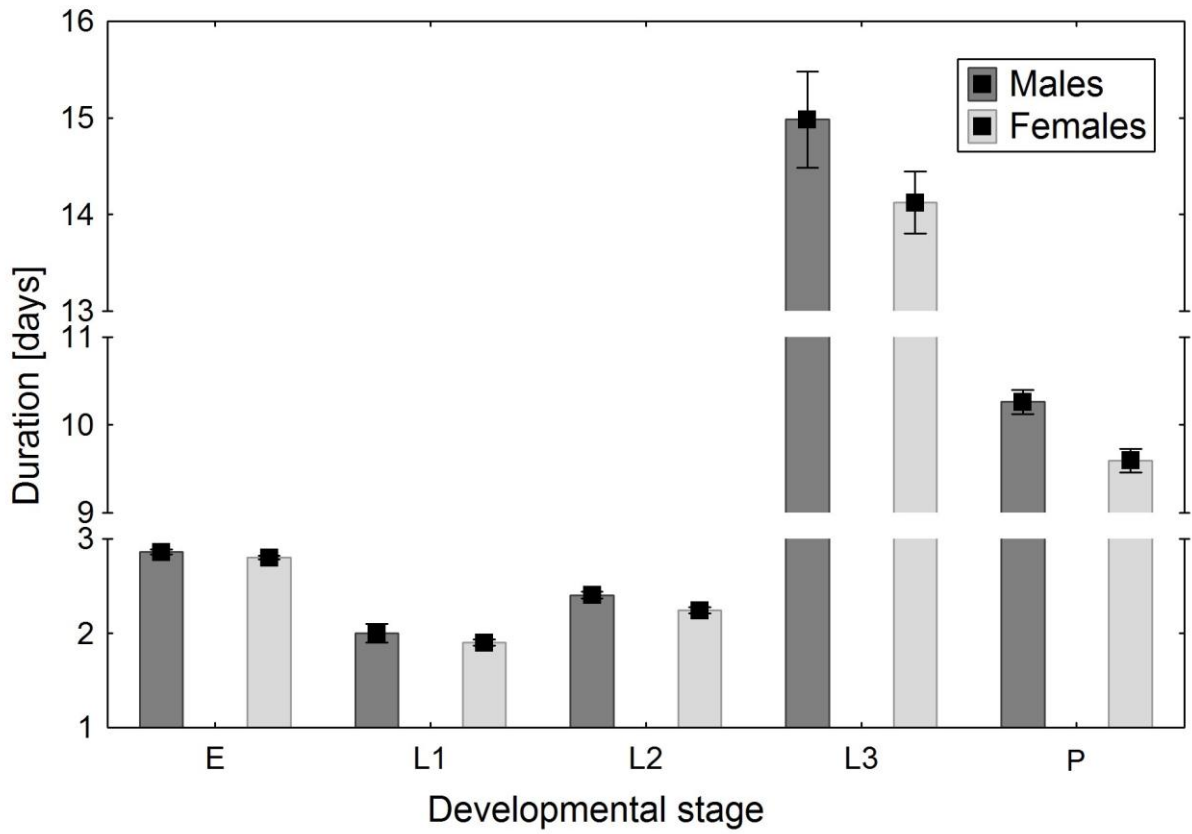

27.5°C

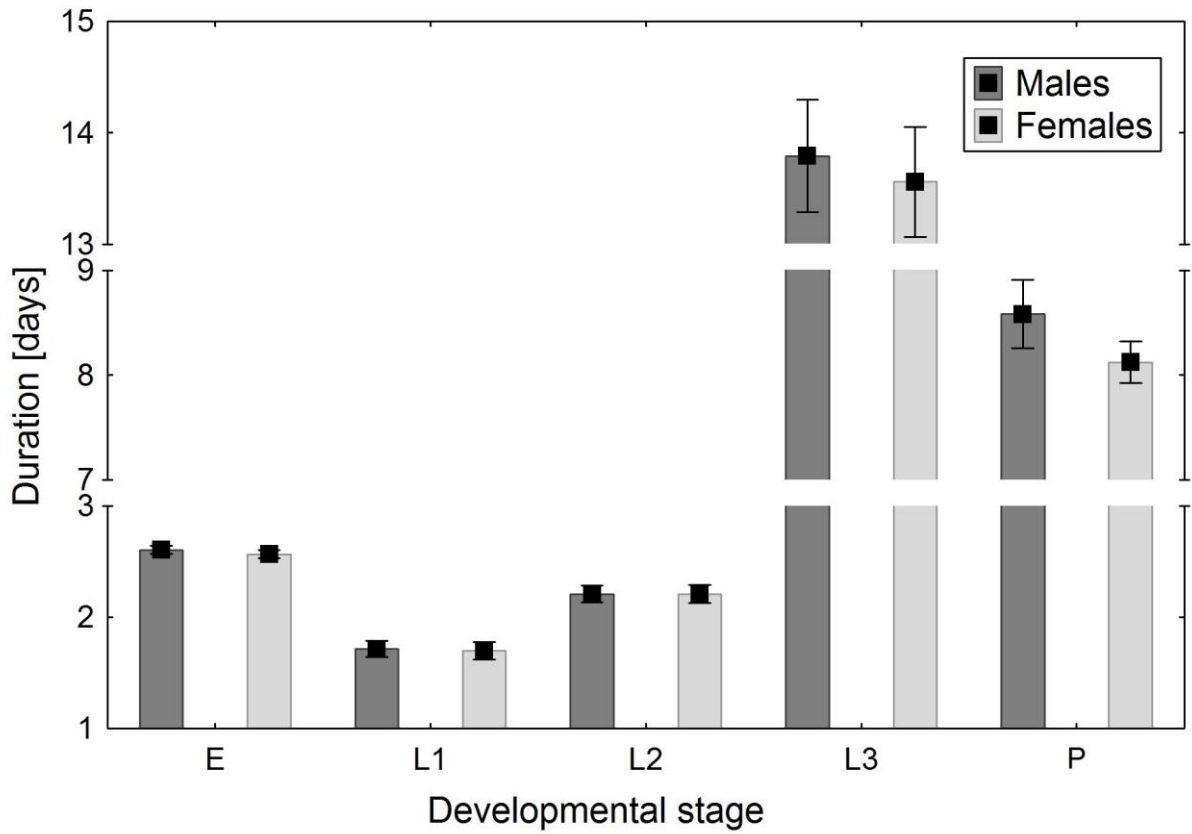

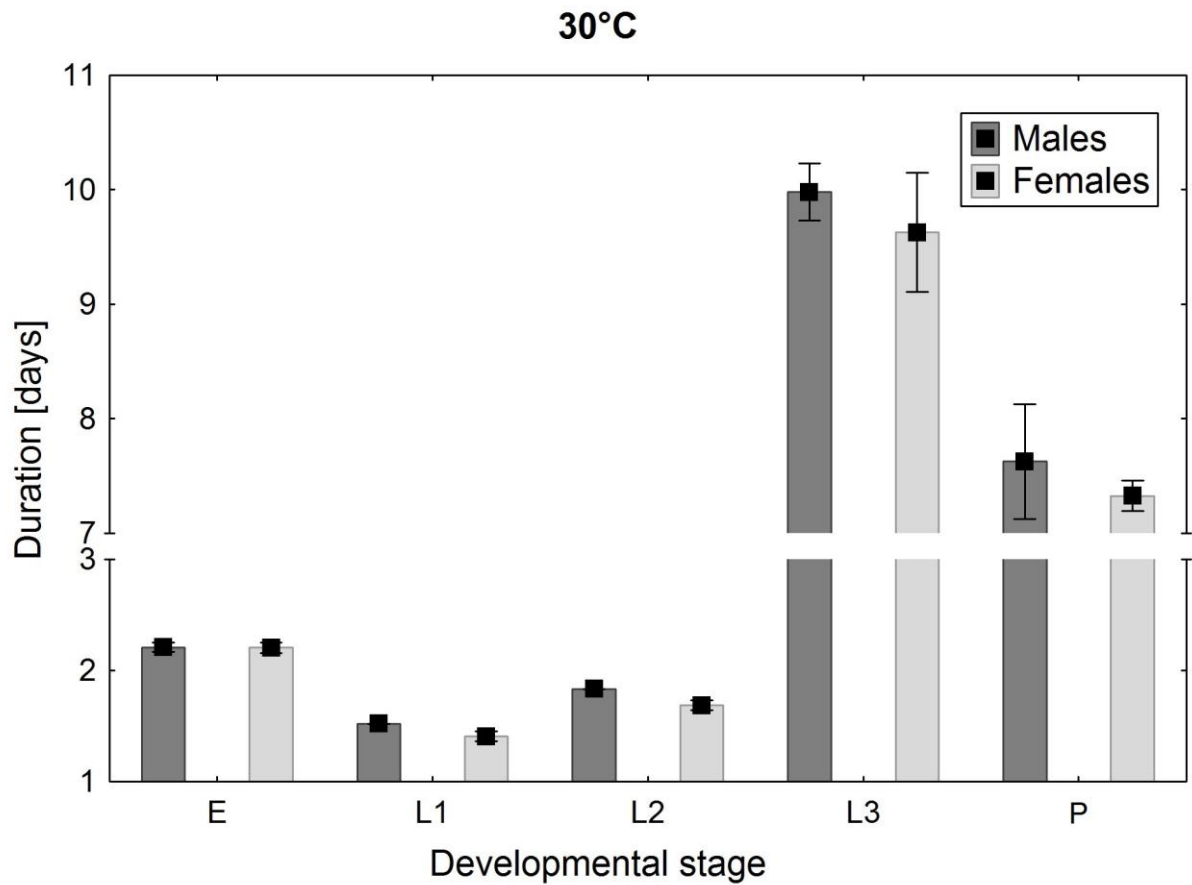

Fig. 1. Differences between males and females of *C. maxillosus* in duration of life stages at 15°C, 17.5°C, 20°C, 22.5°C, 25°C, 27.5°C, 30°C; ■ – mean, whiskers – standard error of the mean; E – the egg stage, L1 – first larval stage, L2 – second larval stage, L3 – third larval stage, P – pupal stage.
